# Supplementary material for: Extra-Linguistic Cognitive Functions Involved in the Token Test: Results from a Cohort of Non-Aphasic Stroke Patients with Right Hemisphere Lesion
Source: MDPI journal article supplement (doi:10.3390/bs12120494), 2022-12-03
Supplement: s1 [file s1]

## **Supplementary materials**

File S1. Lesion sites, number of subjects and percentage in the sample:

- 1 (2.7%) frontal+parietal+temporal+basal ganglia
- 1 (2.7%) frontal+parietal+thalamus+basal ganglia
- 1 (2.7%) frontal+temporal+thalamus
- 1 (2.7%) parietal+temporal+insula
- 1 (2.7%) frontal+temporal+insula
- 1 (2.7%) temporal+basal ganglia+corona radiata
- 1 (2.7%) frontal+ temporal+occipital
- 1 (2.7%) frontal+parietal+thalamus
- 1 (2.7%) frontal+temporal+thalamus
- 1 (2.7%) frontal+posterior mesial frontal
- 1 (2.7%) frontal+basal ganglia
- 1 (2.7%) parietal+temporal
- 2 (5.4%) basal ganglia+capsula
- 2 (5.4%) thalamus+basal ganglia
- 1 (2.7%) thalamus+pyramidal tracts
- 1 (2.7%) basal ganglia+internal capsule
- 1 (2.7%) subcortical-mid-brain
- 1(2.7%) pons+mid-brain right
- 1 (2.7%) temporal
- 3 (8.1%) frontal
- 2 (5.4%) parietal
- 6 (16.2%) basal ganglia
- 1 (2.7%) subtentorial lacunar ischemic stroke
- 1 (2.7%) brain stem

1 (2.7%) right posteriore limb of the internal capsule

2 (5.4%) cerebellum

Table S1. Token Test (TT) errors (subparts I to V) by age groups. Data are reported as median [interquartile range].

|                | Age <71 years<br>(N=12) | Age 71-81 years<br>(N=12) | Age>81 years<br>(N=13) |
|----------------|-------------------------|---------------------------|------------------------|
| TT subpart I   | 0 [0]                   | 0 [0]                     | 0 [1]                  |
| TT subpart II  | 0 [0]                   | 0.5 [1]                   | 0 [3]                  |
| TT subpart III | 0 [0]                   | 0 [0]                     | 2 [2]                  |
| TT subpart IV  | 0 [0]                   | 1.5 [3]                   | 3 [5]                  |
| TT subpart V   | 1 [2]                   | 1 [5]                     | 5 [4]                  |
